# Supplementary material for: How do plants see the world? – UV imaging with a TiO2nanowire array by artificial photosynthesis
Source: Royal Society of Chemistry journal article supplement (doi:10.1039/c8nr00041g), 2018-01-01
Supplement: c8nr00041g1.pdf [file c8nr00041g1.pdf]

## Supplementary Information

### **How Do Plants See the World? - UV Imaging with TiO<sub>2</sub>**

### **Nanowire Array by Artificial Photosynthesis**

Ji-Hoon Kang,<sup>a,c,#</sup> Thibault Leportier,<sup>a,#</sup> Min-Chul Park,<sup>\*,a,c</sup> Sung Gyu Han,<sup>b,d</sup> Jin-Dong Song,<sup>a</sup>  
Hyunsu Ju,<sup>a</sup> Yun Jeong Hwang,<sup>b</sup> Byeong-Kwon Ju,<sup>c</sup> and Ting-Chung Poon<sup>\*,f</sup>

<sup>a</sup>*Center for Opto-Electronic Materials and Devices and <sup>b</sup>Clean Energy Research Center, Korea  
Institute of Science and Technology, Seoul 02792, Republic of Korea*

<sup>c</sup>*Display and Nanosystem Laboratory, College of Engineering and <sup>d</sup>Department of Physics,  
College of Science, Korea University, Seoul 02841, Republic of Korea*

<sup>e</sup>*Division of Nano & Information Technology, Korea University of Science and Technology,  
Seoul 02792, Republic of Korea*

<sup>f</sup>*Bradley Department of Electrical and Computer Engineering, Virginia Tech, Blacksburg VA  
24061, USA*

\*E-mail: minchul@kist.re.kr; tcpoon@vt.edu

<sup>#</sup>These authors contributed equally to this work.

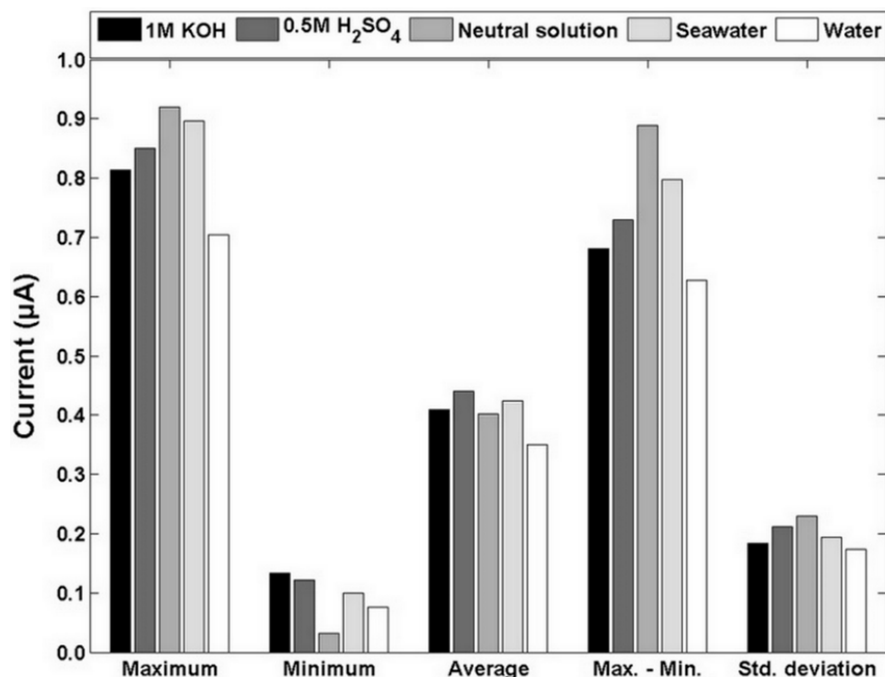

**Fig S1.** The comparison of photocurrents acquired from image scanning with five different conditions. The photocurrents obtained from the five different conditions are compared in table S1 and figure S1. The dynamic range and contrast are calculated for image quality evaluation. The dynamic range is the total range of current obtained with the sensor from minimum to maximum. In addition of the dynamic range, contrast is a basic perceptual attribute of an image. Since the visual system is more sensitive to contrast than absolute luminance, root-mean-square (RMS) contrasts are calculated from the images acquired in five different conditions. RMS contrast is define as the standard deviation of the pixel intensities.<sup>1</sup> Based on the results of 0.5M H<sub>2</sub>SO<sub>4</sub>, the results of the other conditions show only a small difference of  $\pm 0.04 \mu\text{A}$  on the RMS value. These results confirmed that TiO<sub>2</sub> in solutions can be used in a stable way to acquire images under different environments.

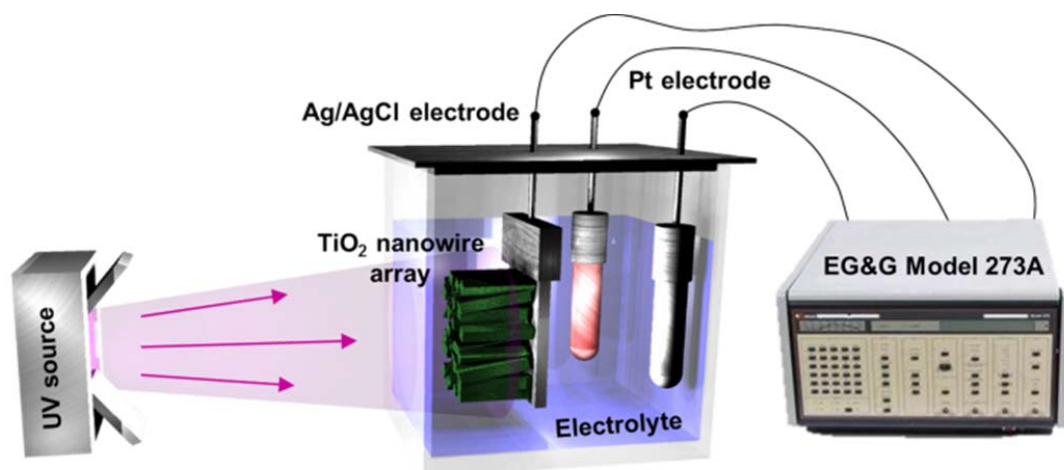

**Fig S2.** Schematic illustration of IPCE measurement with three-electrode system.

**Table S1.** The photocurrents measured from image scanning with five different conditions

| Electrolytes                        | Max.<br>( $\mu\text{A}$ ) | Min.<br>( $\mu\text{A}$ ) | Avg.<br>( $\mu\text{A}$ ) | Max. – Min. <sup>a</sup><br>( $\mu\text{A}$ ) | Std. deviation <sup>b</sup><br>( $\mu\text{A}$ ) |
|-------------------------------------|---------------------------|---------------------------|---------------------------|-----------------------------------------------|--------------------------------------------------|
| 1M KOH                              | 0.814                     | 0.134                     | 0.409                     | 0.680                                         | 0.184                                            |
| 0.5M H <sub>2</sub> SO <sub>4</sub> | 0.850                     | 0.121                     | 0.441                     | 0.729                                         | 0.211                                            |
| Neutral<br>solution                 | 0.919                     | 0.031                     | 0.402                     | 0.888                                         | 0.230                                            |
| Seawater                            | 0.896                     | 0.099                     | 0.424                     | 0.797                                         | 0.194                                            |
| Water                               | 0.704                     | 0.076                     | 0.351                     | 0.628                                         | 0.173                                            |

<sup>a</sup>The dynamic range is the total range of the sensor from minimum to maximum (Max. – Min.). <sup>b</sup>Root mean square (RMS) contrast is defined as the standard deviation of the pixel intensities.

## REFERENCES

- 1 E. Peli, *J Opt Soc Am A*, 1990, **7**, 2032-2040.
